# Supplementary material for: North Atlantic Oscillation polarity during the past 3000 years derived from sediments of a large lowland lake, Schweriner See, in NE Germany
Source: Copernicus journal article supplement (doi:10.5194/cp-20-2143-2024), 2024-09-26
Supplement: Supplementary file 2 [file cp-20-2143-2024-supplement.zip]

Supplementary Fig.s and Tab.s

**Fig. S1:** Correlation matrices (r-value) for the composite record of SAS22-2, SAS21-11 and SAS21-12 for 1 cm resolution data. XRF data were scaled to a 5pt average to account for the noise ratio and different sampling resolution between XRF and other parameters. Only significant values ( $p \leq 0.001$ ). Green and red colours indicate positive and negative correlations, respectively.

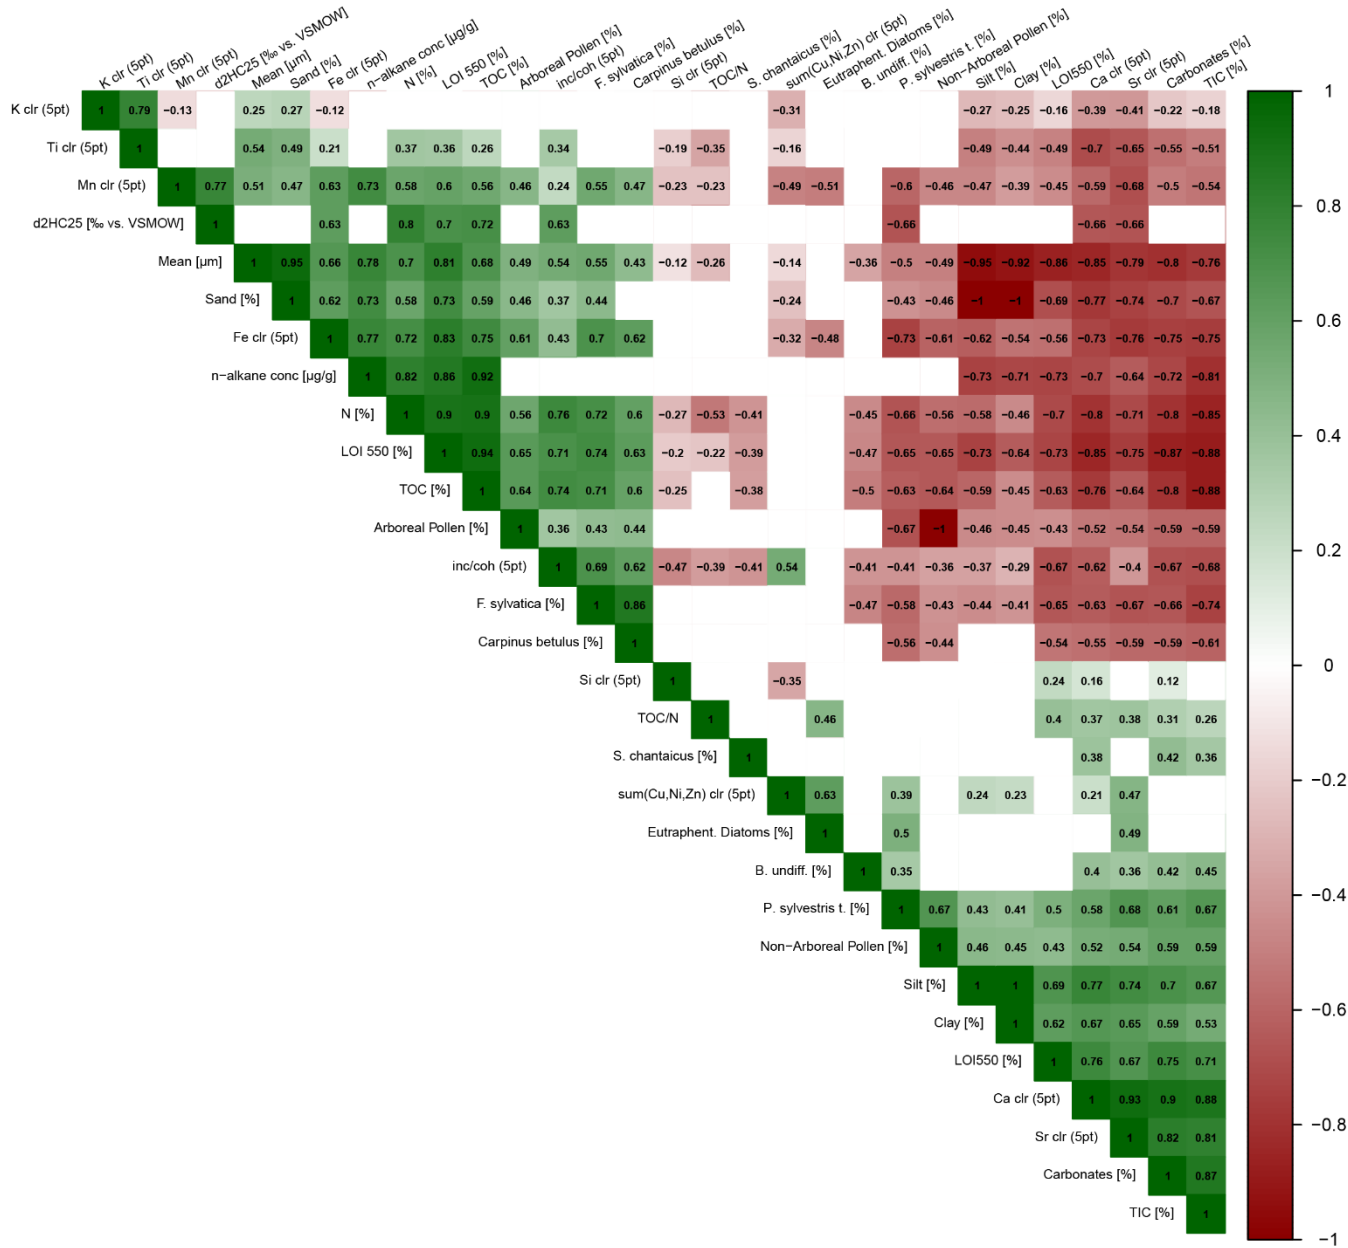

**Fig. S2:** *n*-alkane concentration ( $C_{21}$ - $C_{35}$ ), individual concentration of *n*-alkanes ( $C_{23}$  –  $C_{31}$ ) available in sufficient amounts for  $\delta^2H$  measurements as well as average chain length (ACL; Poynter et al., 1989),  $Paq'$  ( Strobel et al., 2021) and odd-over-even predominance (OEP; Hoefs et al., 2002 ). The compound-specific hydrogen isotopic signature ( $\delta^2H$ ) of the *n*-alkanes  $C_{23}$  –  $C_{31}$  is also shown.

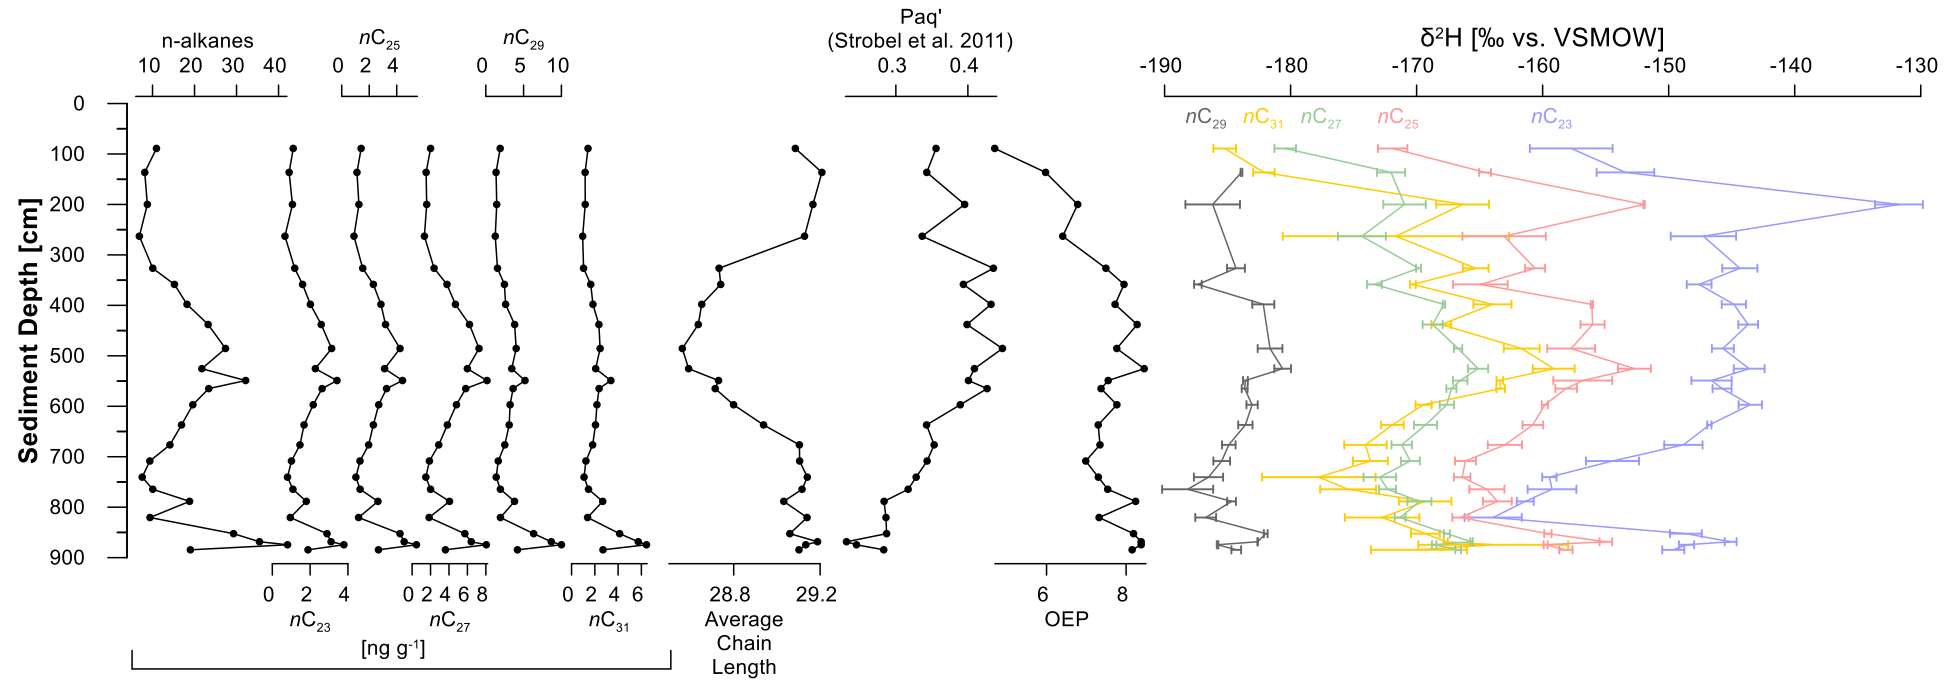

**Tab. S1:** Fallout radionuclide concentrations in the Schweriner See sediment core SAS22-2

| Depth |                    | <sup>210</sup> Pb   |      |                     |      |                     |     | <sup>137</sup> Cs   |     |
|-------|--------------------|---------------------|------|---------------------|------|---------------------|-----|---------------------|-----|
|       |                    | Total               |      | Unsupported         |      | Supported           |     |                     |     |
| cm    | g cm <sup>-2</sup> | Bq kg <sup>-1</sup> | ±    | Bq kg <sup>-1</sup> | ±    | Bq kg <sup>-1</sup> | ±   | Bq kg <sup>-1</sup> | ±   |
| 0.5   | 0.1                | 182.7               | 9.2  | 165.0               | 9.4  | 17.7                | 1.8 | 68.9                | 1.9 |
| 2.5   | 0.6                | 147.5               | 8.4  | 131.9               | 8.6  | 15.6                | 1.8 | 70.8                | 2.0 |
| 4.5   | 1.1                | 96.4                | 8.7  | 80.3                | 8.9  | 16.1                | 1.8 | 67.0                | 1.9 |
| 8.5   | 2.0                | 80.2                | 6.3  | 64.5                | 6.5  | 15.7                | 1.4 | 72.4                | 1.8 |
| 12.5  | 3.0                | 92.2                | 8.5  | 76.0                | 8.7  | 16.2                | 2.2 | 76.4                | 2.4 |
| 16.5  | 3.8                | 92.4                | 7.6  | 80.0                | 7.8  | 12.4                | 1.7 | 106.9               | 2.4 |
| 20.5  | 4.6                | 81.0                | 7.0  | 68.1                | 7.2  | 12.9                | 1.6 | 120.1               | 2.3 |
| 24.5  | 5.5                | 83.7                | 9.6  | 64.7                | 9.9  | 19.0                | 2.4 | 169.3               | 3.1 |
| 28.5  | 6.4                | 90.3                | 8.1  | 70.6                | 8.3  | 19.7                | 1.8 | 424.7               | 3.8 |
| 32.5  | 7.3                | 62.0                | 9.8  | 39.0                | 10.2 | 23.0                | 2.9 | 35.2                | 2.3 |
| 36.5  | 8.2                | 65.1                | 6.3  | 47.8                | 6.5  | 17.3                | 1.4 | 38.9                | 1.6 |
| 40.5  | 9.1                | 71.6                | 7.6  | 55.7                | 7.7  | 15.9                | 1.7 | 48.5                | 1.7 |
| 44.5  | 10.0               | 55.1                | 8.3  | 41.2                | 8.6  | 13.9                | 2.1 | 51.5                | 2.1 |
| 48.5  | 10.8               | 39.0                | 9.8  | 21.7                | 10.1 | 17.2                | 2.5 | 24.9                | 1.9 |
| 52.5  | 11.6               | 36.8                | 5.1  | 19.6                | 5.3  | 17.2                | 1.4 | 13.9                | 1.0 |
| 56.5  | 12.5               | 45.3                | 9.1  | 21.6                | 9.4  | 23.7                | 2.2 | 3.7                 | 1.5 |
| 60.5  | 13.5               | 46.2                | 10.8 | 25.1                | 11.1 | 21.1                | 2.7 | 1.7                 | 1.7 |
| 64.5  | 14.4               | 32.3                | 10.7 | 14.4                | 11.1 | 17.9                | 3.0 | 0.0                 | 0.0 |
| 68.5  | 15.4               | 28.3                | 10.1 | 5.5                 | 10.5 | 22.9                | 2.7 | 0.0                 | 0.0 |

**Tab. S2:** Fallout radionuclide concentrations in the Schweriner See sediment core SAS21-11-2

| Depth    |          | <sup>210</sup> Pb   |      |                     |     | <sup>137</sup> Cs |     |
|----------|----------|---------------------|------|---------------------|-----|-------------------|-----|
| Relative | Absolute | Total               |      | Supported           |     |                   |     |
| cm       | cm       | Bq kg <sup>-1</sup> | ±    | Bq kg <sup>-1</sup> | ±   | Bq kg-1           | ±   |
| 0.5      | 57.5     | 38.3                | 7.8  | 20.0                | 2.0 | 6.7               | 1.4 |
| 2.5      | 59.5     | 54.8                | 10.5 | 18.0                | 2.8 | 8.9               | 1.8 |
| 7.5      | 64.5     | 42.0                | 9.4  | 22.7                | 2.3 | 4.9               | 1.7 |
| 11.5     | 68.5     | 34.1                | 11.5 | 19.1                | 3.1 | 7.2               | 2.0 |

**Tab. S3:**  $^{210}\text{Pb}$  chronology of the Schweriner See sediment core SAS22-2

| Depth |                    | Chronology |          |    | Sedimentation Rate                 |                    |       |
|-------|--------------------|------------|----------|----|------------------------------------|--------------------|-------|
| cm    | g cm <sup>-2</sup> | Date<br>AD | Age<br>y | ±  | g cm <sup>-2</sup> y <sup>-1</sup> | cm y <sup>-1</sup> | ± (%) |
| 0.0   | 0.00               | 2022       | 0        | 0  |                                    |                    |       |
| 0.5   | 0.12               | 2021       | 1        | 1  | 0.15                               | 0.61               | 10.3  |
| 2.5   | 0.61               | 2018       | 4        | 2  | 0.17                               | 0.73               | 12.1  |
| 4.5   | 1.05               | 2016       | 6        | 2  | 0.24                               | 1.01               | 12.2  |
| 8.5   | 2.00               | 2012       | 10       | 2  | 0.25                               | 1.02               | 13.7  |
| 12.5  | 2.98               | 2008       | 14       | 2  | 0.21                               | 0.95               | 14.0  |
| 16.5  | 3.78               | 2004       | 18       | 2  | 0.18                               | 0.86               | 13.4  |
| 20.5  | 4.63               | 1998       | 24       | 3  | 0.16                               | 0.73               | 15.2  |
| 24.5  | 5.48               | 1993       | 29       | 4  | 0.14                               | 0.64               | 18.8  |
| 28.5  | 6.41               | 1986       | 36       | 4  | 0.15                               | 0.67               | 19.4  |
| 32.5  | 7.28               | 1981       | 41       | 4  | 0.19                               | 0.86               | 18.7  |
| 36.5  | 8.19               | 1977       | 45       | 5  | 0.19                               | 0.83               | 18.7  |
| 40.5  | 9.08               | 1971       | 51       | 4  | 0.13                               | 0.58               | 18.7  |
| 44.5  | 9.97               | 1963       | 59       | 4  | 0.12                               | 0.54               | 18.7  |
| 48.5  | 10.82              | 1956       | 66       | 5  | 0.12                               | 0.59               | 18.7  |
| 52.5  | 11.65              | 1949       | 73       | 6  | 0.11                               | 0.54               | 18.7  |
| 56.5  | 12.52              | 1941       | 81       | 7  | 0.08                               | 0.37               | 18.7  |
| 60.5  | 13.45              | 1928       | 94       | 9  | 0.06                               | 0.25               | 18.7  |
| 64.5  | 14.40              | 1909       | 113      | 12 | 0.06                               | 0.24               | 18.7  |

**Tab. S4:** Conventional AMS  $^{14}\text{C}$  ages for sediment core SAS21. Dating results were obtained from terrestrial macro remains.

| Sample Name          | Lab ID     | Conventional Age<br>[BP] | Error | Depth<br>[cm] |
|----------------------|------------|--------------------------|-------|---------------|
| SAS21-11-2 27        | Poz-162150 | 210                      | 30    | 85            |
| SAS21-11-4 17 cm     | Poz-148478 | 600                      | 30    | 300           |
| SAS21-12-3 54.5cm    | Poz-145372 | 730                      | 30    | 312           |
| SAS21-12-4 90cm      | Poz-145415 | 1130                     | 30    | 397           |
| SAS21-11-6 10 cm     | Poz-147404 | 1320                     | 30    | 456.5         |
| SAS21-11-6 55 cm     | Poz-147405 | 1470                     | 30    | 501.5         |
| SAS21-12-6 0 cm      | Poz-145232 | 1560                     | 30    | 529           |
| SAS21-12-6 54.5cm    | Poz-145233 | 1760                     | 0     | 583           |
| SAS21-12-6 70.5cm    | Poz-145371 | 1900                     | 35    | 599           |
| SAS21-12-7 19-19.5cm | Poz-145416 | 2020                     | 40    | 669.5         |
| SAS21-12-8 15-15.5cm | Poz-145417 | 2440                     | 60    | 777.5         |
| SAS21-12-8 44-45cm   | Poz-155010 | 2545                     | 35    | 806.5         |
| SAS21-12-9 31-32cm   | Poz-154638 | 3030                     | 30    | 897.5         |

## References

- Hoefs, M. J., Rijpstra, W. C., and Sinninghe Damsté, J. S.: The influence of oxic degradation on the sedimentary biomarker record I: evidence from Madeira Abyssal Plain turbidites, *Geochimica et Cosmochimica Acta*, 66, 2719–2735, doi:10.1016/S0016-7037(02)00864-5, 2002.
- Poynter, J. G., Farrimond, P., Robinson, N., and Eglinton, G.: Aeolian-Derived Higher Plant Lipids in the Marine Sedimentary Record: Links with Palaeoclimate, in: *Paleoclimatology and Paleometeorology: Modern and Past Patterns of Global Atmospheric Transport*, Springer, Dordrecht, 435–462, 1989.
- Strobel, P., Struck, J., Zech, R., and Bliedtner, M.: The spatial distribution of sedimentary compounds and their environmental implications in surface sediments of Lake Khar Nuur (Mongolian Altai), *Earth Surf. Process. Landforms*, 46, 611–625, doi:10.1002/esp.5049, 2021.
