# Supplementary material for: North Atlantic Oscillation polarity during the past 3000 years derived from sediments of a large lowland lake, Schweriner See, in NE Germany
Source: Copernicus journal article supplement (doi:10.5194/cp-20-2143-2024), 2024-09-26
Supplement: Supplementary file 3 [file cp-20-2143-2024-supplement.zip]

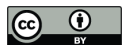

*Supplement of*

**North Atlantic Oscillation polarity during the past 3000 years derived from sediments of a large lowland lake, Schweriner See, in NE Germany**

**Marie-Luise Adolph et al.**

*Correspondence to:* Marie-Luise Adolph ([marie-luise.adolph@uni-greifswald.de](mailto:marie-luise.adolph@uni-greifswald.de))

- cp-20-2143-2024-supplement-title-page.pdf
- Adolph et al.,\_Electronic Supplement\_NAO-Variability.pdf
- SAS21-11+12\_91.bacon
- SAS21-11+12\_91.out
- SAS21-11+12\_91.pdf
- SAS21-11+12\_91\_ages.txt

The copyright of individual parts of the supplement might differ from the article licence.
