# Supplementary figures and images for: North Atlantic Oscillation polarity during the past 3000 years derived from sediments of a large lowland lake, Schweriner See, in NE Germany
Source: Copernicus journal article supplement (doi:10.5194/cp-20-2143-2024), 2024-09-26

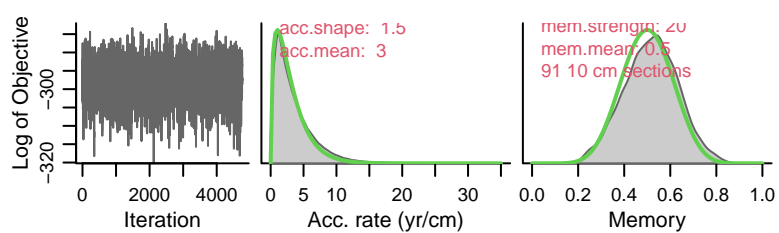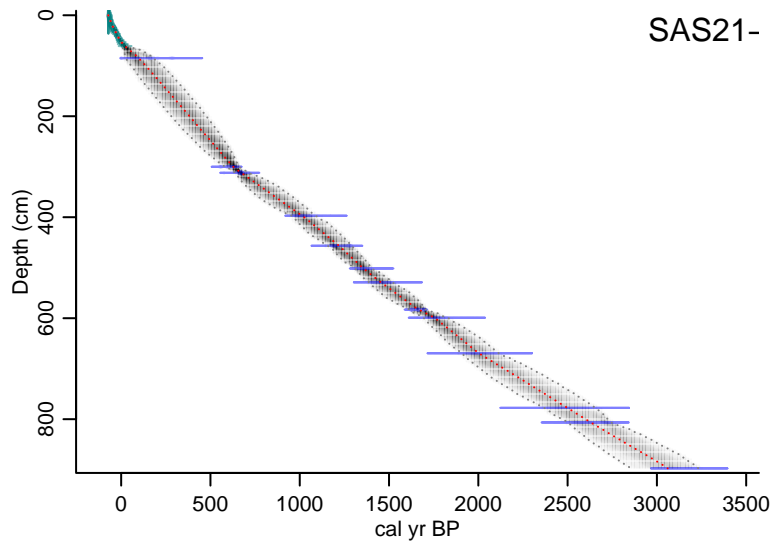

Supplement: Supplementary file 1 [file cp-20-2143-2024-supplement.zip]
